# Supplementary material
Source: MDPI journal article supplement (https://www.mdpi.com/2311-5521/6/6/221)
Supplement: s1 [file s1]

## SUPPLEMENTARY MATERIAL

*Effects of varying inhalation duration and respiratory rate on human airway flow*

Manikantam G. Gaddam and Arvind Santhanakrishnan

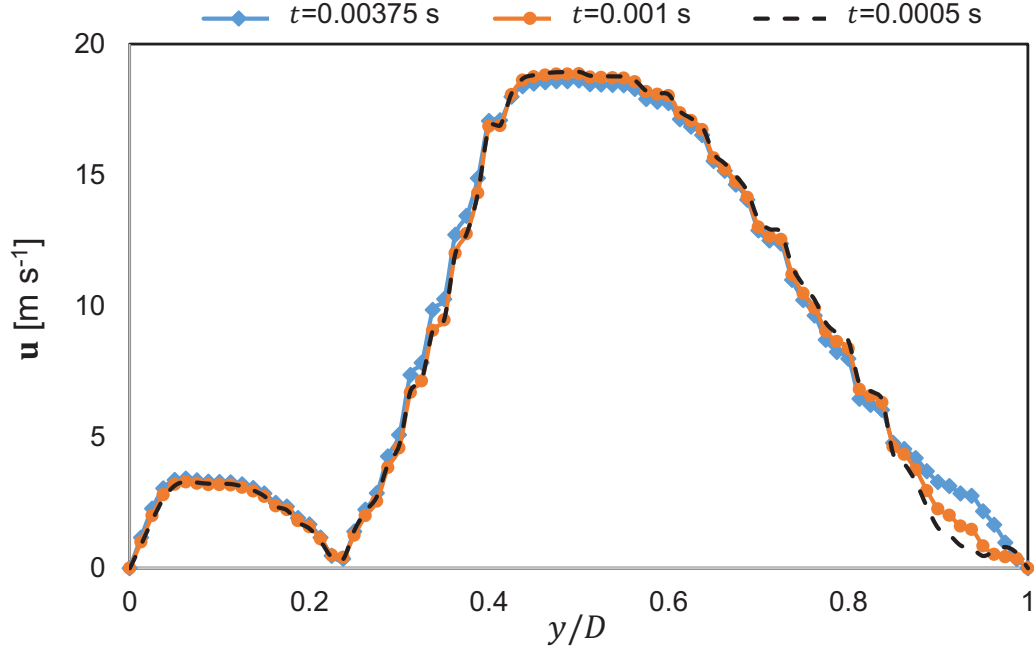

**Figure S1.** Time-step size independence test for  $Wo = 24.1$  and  $IT/BT = 50\%$ . Three-dimensional velocity ( $u$ ) was extracted along the coronal plane in the upper trachea (plane 1 in **Table 2**) and plotted as a function of non-dimensional diameter  $y/D$ .  $D$  = trachea diameter = 18 mm.

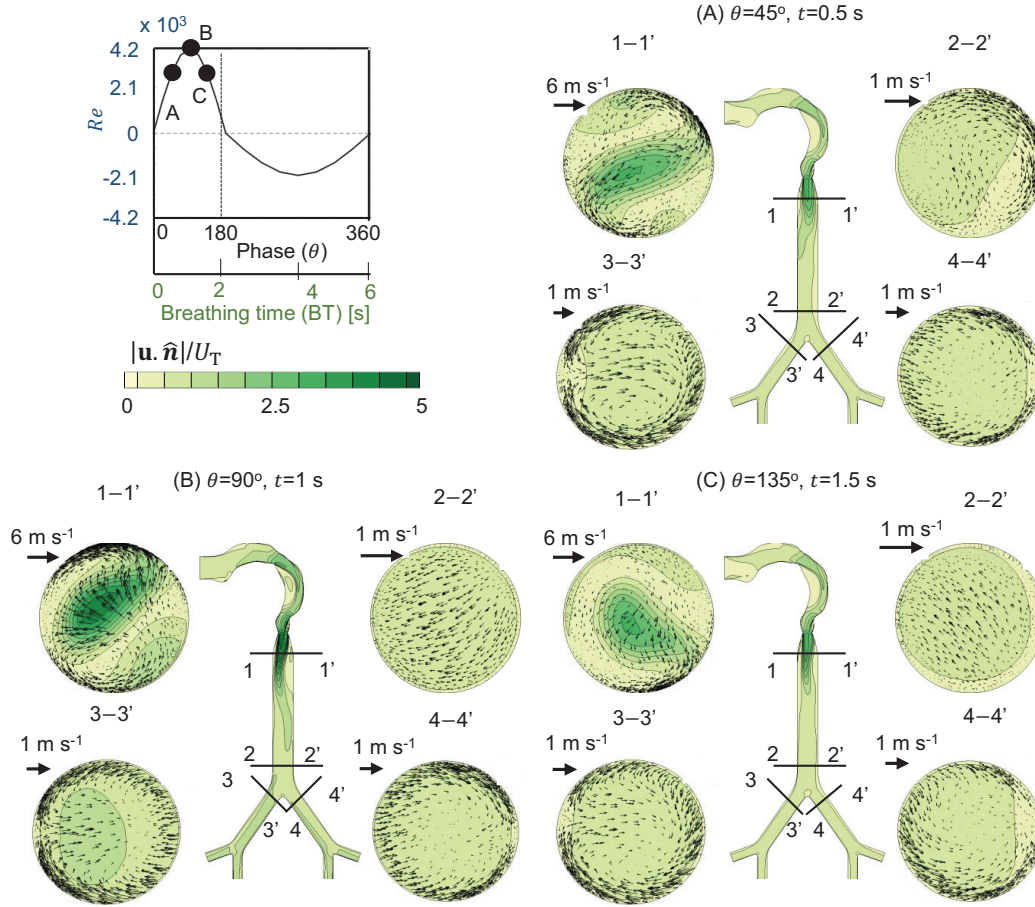

**Figure S2.** Contours of magnitude of plane-normal velocity component (non-dimensionalized with mean flow speed in trachea,  $U_T$ ) with superimposed in-plane velocity vectors for planes 1–4 at various time points during inhalation for  $Wo = 2.41$  at  $IT/BT = 33\%$ . A is at phase  $\theta = 45^\circ$  ( $= 25\%$  IT), B is at phase  $\theta = 90^\circ$  ( $= 50\%$  IT) and C is at phase  $\theta = 135^\circ$  ( $= 75\%$  IT). Coronal plane shows the locations of each plane.

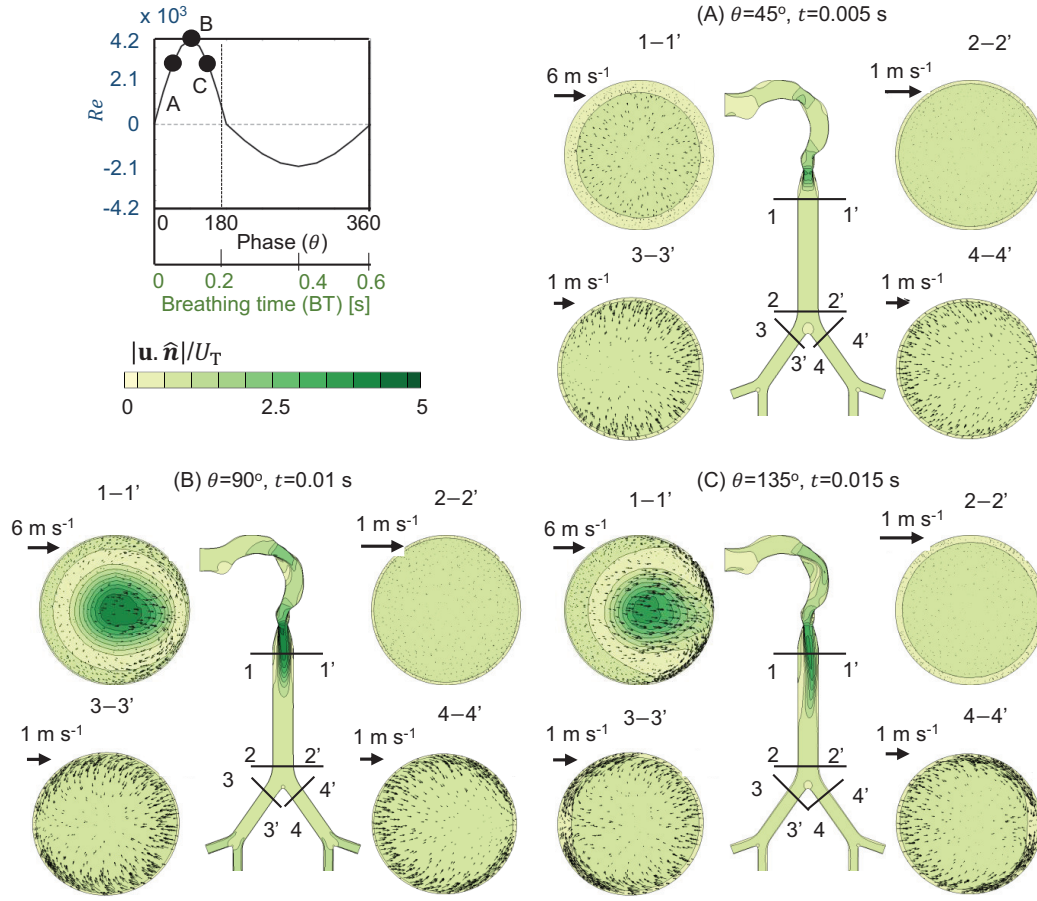

**Figure S3.** Contours of magnitude of plane-normal velocity component (non-dimensionalized with mean flow speed in trachea,  $U_T$ ) with superimposed in-plane velocity vectors for planes 1–4 at various time points during inhalation for  $Wo = 24.1$  at  $IT/BT = 33\%$ . A is at phase  $\theta = 45^\circ$  ( $=25\%$  IT), B is at phase  $\theta = 90^\circ$  ( $=50\%$  IT) and C is at phase  $\theta = 135^\circ$  ( $=75\%$  IT).

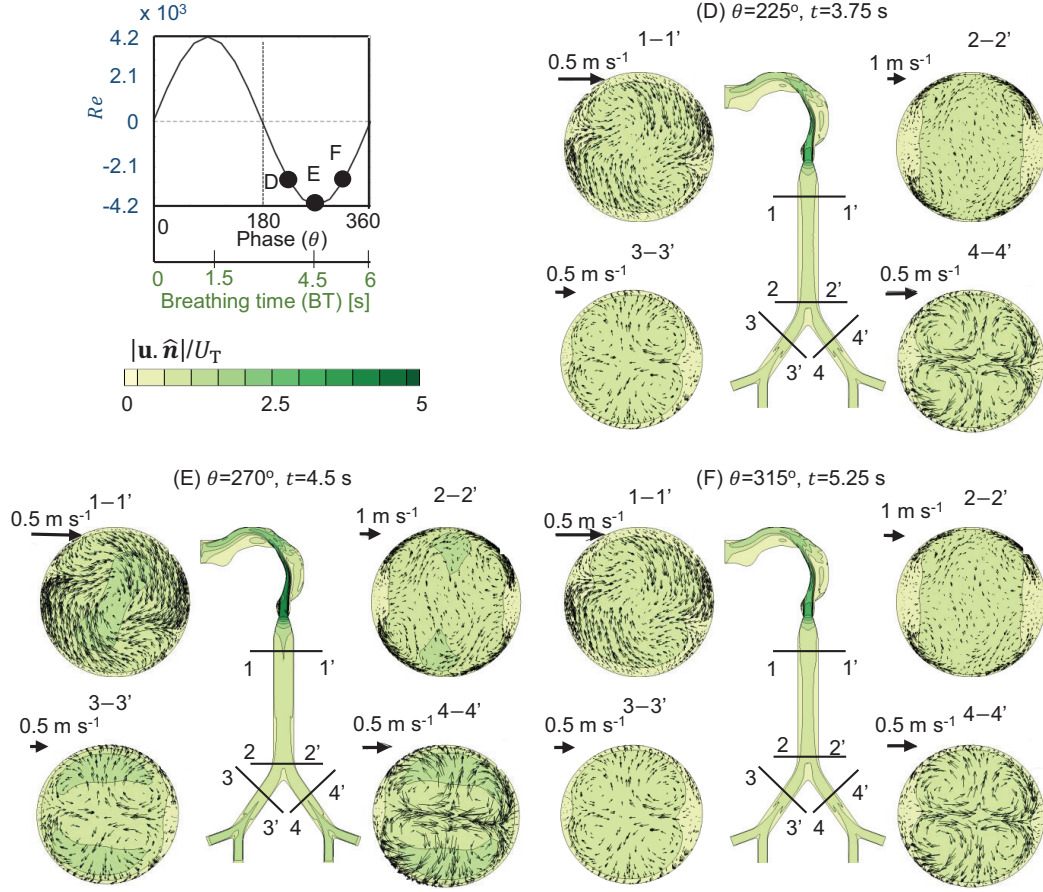

**Figure S4.** Contours of magnitude of plane-normal velocity component (non-dimensionalized with mean flow speed in trachea,  $U_T$ ) with superimposed in-plane velocity vectors for planes 1–2 at various time points during exhalation for  $Wo = 2.41$  at IT/BT = 50%. D is at phase  $\theta = 225^\circ$  (= 25% ET), E is at phase  $\theta = 270^\circ$  (= 50% ET) and F is at phase  $\theta = 315^\circ$  (= 75% ET).

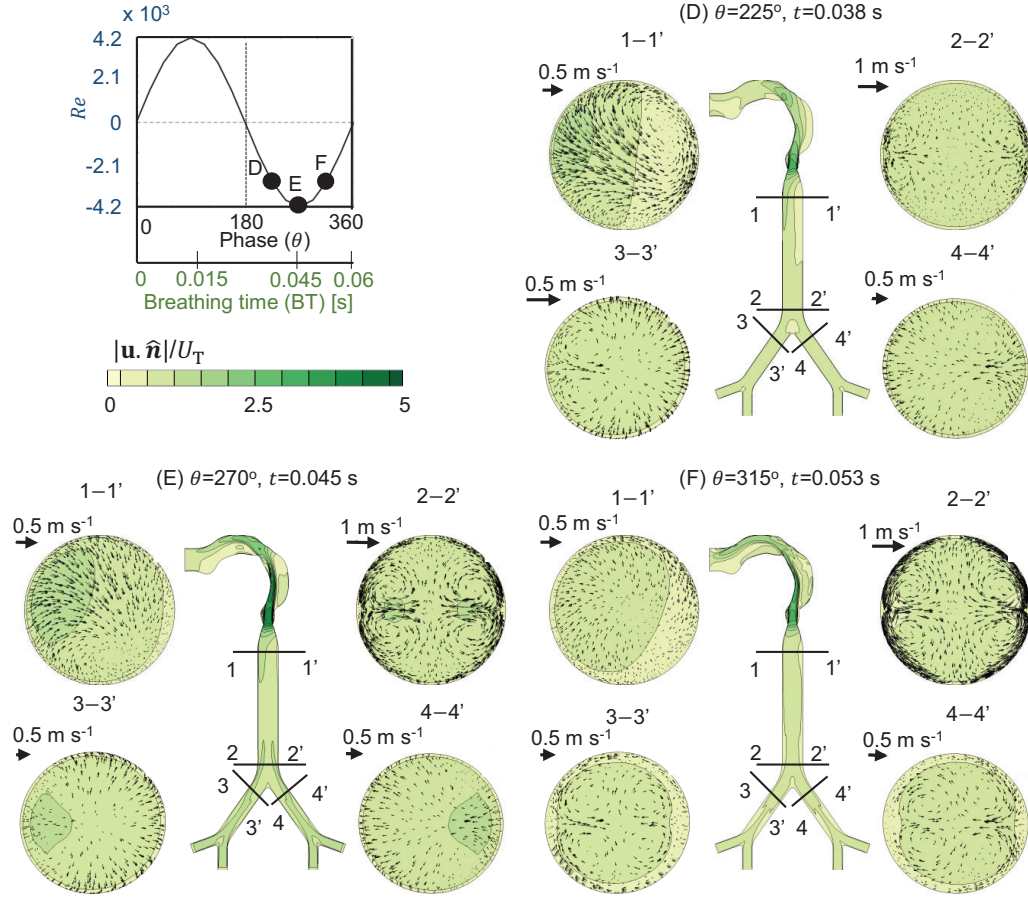

**Figure S5.** Contours of magnitude of plane-normal velocity component (non-dimensionalized with mean flow speed in trachea,  $U_T$ ) with superimposed in-plane velocity vectors for planes 1–2 at various time points during exhalation for  $Wo = 24.1$  at IT/BT = 50%. D is at phase  $\theta = 225^\circ$  (= 25% ET), E is at phase  $\theta = 270^\circ$  (= 50% ET) and F is at phase  $\theta = 315^\circ$  (= 75% ET).

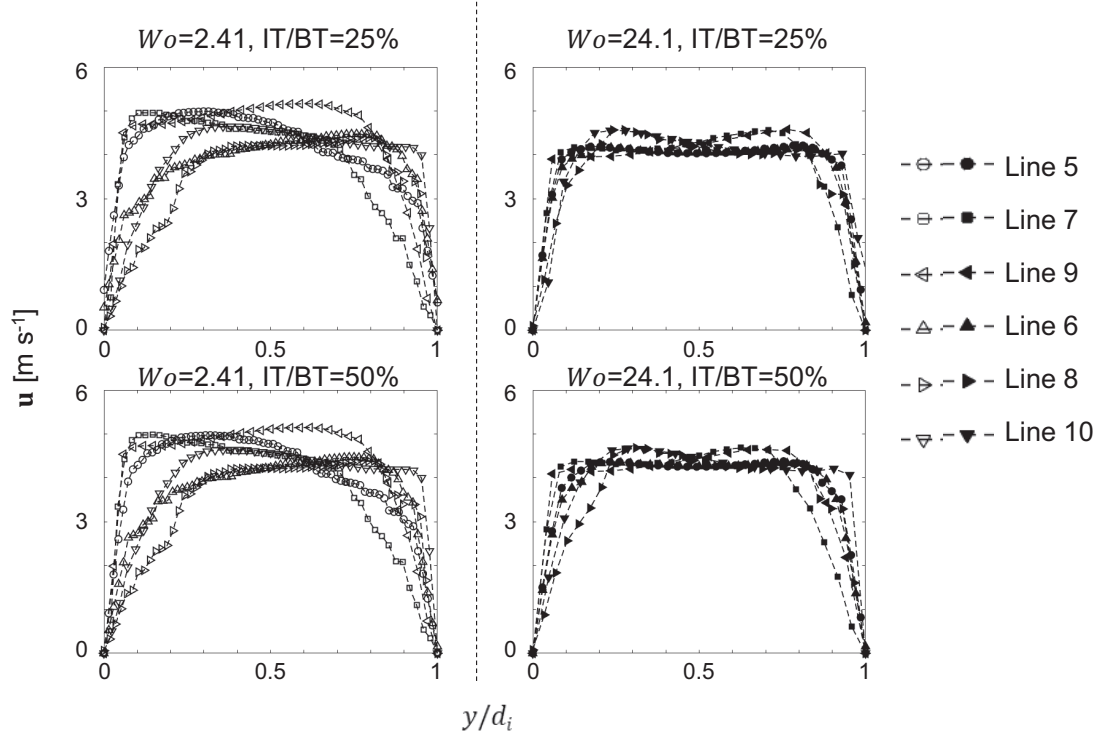

**Figure S6.** Velocity profiles along coronal plane at in planes 5-10 for varying  $Wo$  and IT/BT conditions. Three-dimensional velocity ( $\mathbf{u}$ ) was extracted along the line across the coronal plane diameter and plotted as a function of non-dimensional diameter  $y/d_i$ , where  $d_i$  is the airway cross-sectional diameter in  $i^{th}$  plane (refer **Table 2**).

**TABLE S1.** Local Reynolds number ( $Re_L$ ) and local Womersley number ( $Wo_L$ ) at each plane listed in Table 2.  $Re_L$  and  $Wo_L$  were calculated as:  $Re_L = \frac{V_L D_L}{\nu}$  and  $Wo_L = \frac{D_L}{2} \sqrt{\frac{1}{\nu} \left( \frac{2\pi}{BT} \right)}$ , where  $D_L$  is the local airway diameter at a given plane,  $V_L$  is the average local axial velocity, BT is the breathing time and  $\nu$  is the kinematic viscosity of air ( $\nu = 1.4 \times 10^{-5} \text{ m}^2 \text{ s}^{-1}$ ).

| Location | Description        | $Re_L/Wo_L$                 |                             |                             |                             |                             |                             |                             |                             |                             |  |
|----------|--------------------|-----------------------------|-----------------------------|-----------------------------|-----------------------------|-----------------------------|-----------------------------|-----------------------------|-----------------------------|-----------------------------|--|
|          |                    | $Wo = 2.41,$<br>IT/BT = 25% | $Wo = 2.41,$<br>IT/BT = 33% | $Wo = 2.41,$<br>IT/BT = 50% | $Wo = 7.51,$<br>IT/BT = 25% | $Wo = 7.51,$<br>IT/BT = 33% | $Wo = 7.51,$<br>IT/BT = 50% | $Wo = 24.1,$<br>IT/BT = 25% | $Wo = 24.1,$<br>IT/BT = 33% | $Wo = 24.1,$<br>IT/BT = 50% |  |
| Plane 1  | Upper trachea (G0) | 6794/2.4                    | 6947/2.4                    | 6894/2.4                    | 6653/7.62                   | 7165/7.61                   | 7418/7.61                   | 6750/24.8                   | 6620/24.8                   | 6602/24.8                   |  |
| Plane 2  | Lower trachea (G0) | 4224/2.4                    | 4228/2.4                    | 4227/2.4                    | 4210/7.61                   | 4227/7.61                   | 4247/7.61                   | 4141/24.8                   | 4224/24.8                   | 4224/24.8                   |  |
| Plane 3  | Generation (G1)    | 3274/1.63                   | 3276/1.63                   | 3275/1.63                   | 2956/5.15                   | 2947/5.15                   | 3237/5.15                   | 3015/16.3                   | 3076/16.3                   | 3079/16.3                   |  |
| Plane 4  | Generation (G1)    | 3932/1.63                   | 2933/1.63                   | 2934/1.63                   | 3235/5.15                   | 3267/5.15                   | 2984/5.15                   | 3056/16.3                   | 3118/16.3                   | 3121/16.3                   |  |
| Plane 5  | Generation (G1)    | 3311/1.63                   | 3315/1.63                   | 3313/1.63                   | 2992/5.15                   | 2932/5.15                   | 3264/5.15                   | 3058/16.3                   | 3119/16.3                   | 3119/16.3                   |  |
| Plane 6  | Generation (G1)    | 2930/1.63                   | 2931/1.63                   | 2932/1.63                   | 3229/5.15                   | 3261/5.15                   | 2980/5.15                   | 3057/16.3                   | 3119/16.3                   | 3120/16.3                   |  |
| Plane 7  | Generation (G2)    | 2348/1.11                   | 2359/1.11                   | 2354/1.11                   | 2135/3.53                   | 2130/3.53                   | 2324/3.53                   | 2260/11.18                  | 2307/11.18                  | 2311/11.18                  |  |
| Plane 8  | Generation (G2)    | 2090/1.11                   | 2104/1.11                   | 2096/1.11                   | 2284/3.53                   | 2310/3.53                   | 2118/3.53                   | 2251/11.18                  | 2298/11.18                  | 2302/11.18                  |  |
| Plane 9  | Generation (G2)    | 2535/1.11                   | 2531/1.11                   | 2533/1.11                   | 2278/3.53                   | 2271/3.53                   | 2489/3.53                   | 2239/11.18                  | 2286/11.18                  | 2290/11.18                  |  |
| Plane 10 | Generation (G2)    | 2233/1.11                   | 2221/1.11                   | 2230/1.11                   | 2468/3.53                   | 2487/3.53                   | 2270/3.53                   | 2238/11.18                  | 2285/11.18                  | 2290/11.18                  |  |

## SUPPLEMENTARY MOVIES

**Movie 1.** Three-dimensional velocity (non-dimensionalized with peak mean flow speed in trachea,  $U_T$ ) and  $Q$ -criterion isosurface at various time points during normal breathing for  $Wo = 2.41$  at  $IT/BT = 25\%$ ,  $33\%$  and  $50\%$ .

**Movie 2.** Three-dimensional velocity (non-dimensionalized with peak mean flow speed in trachea,  $U_T$ ) and  $Q$ -criterion isosurface at various time points during normal breathing for  $Wo = 7.61$  at  $IT/BT = 25\%$ ,  $33\%$  and  $50\%$ .

**Movie 3.** Three-dimensional velocity (non-dimensionalized with peak mean flow speed in trachea,  $U_T$ ) and  $Q$ -criterion isosurface at various time points during normal breathing for  $Wo = 24.1$  at  $IT/BT = 25\%$ ,  $33\%$  and  $50\%$ .
